# Supplementary material
Source: HighWire-hosted journal article supplement (https://care.diabetesjournals.org/content/suppl/2006/01/31/29.2.317)
Supplement: dc0809onlineappendix.pdf [file dc0809onlineappendix.pdf]

## Supplementary table

Baseline clinical characteristics (as previously published (4; 11-13))

|                                            | Normoalbuminuria | Microalbuminuria | Macroalbuminuria |
|--------------------------------------------|------------------|------------------|------------------|
|                                            | N=61             | N=40             | N=31             |
| Gender (male %)                            | 48%              | 63%              | 49%              |
| Age (years)                                | 37±1             | 40±2             | 38±1             |
| Age at diabetes onset (years)              | 15±1             | 15±2             | 14±1             |
| Duration of diabetes (years)               | 22±1             | 25±1             | 25±1             |
| Free insulin (mg/dL)                       | 11±3             | 11±2             | 11±2             |
| Insulin dose (U/kg)                        | 0.7±0.0          | 0.7±0.0          | 0.7±0.0          |
| HBA <sub>1C</sub> (%)                      | 7.9±0.2          | 8.2±0.2          | 8.2±0.2          |
| Fasting plasma glucose (mmol/l)            | 11.6±0.6         | 11.7±0.9         | 12.2±1.0         |
| Mean Systolic BP (mmHg)                    | 121±2            | 130±2*           | 139±3*           |
| Mean Diastolic BP (mmHg)                   | 78±1             | 80±1             | 86±2*            |
| Albumin excretion rate (µg/min)            | 6.0              | 52*              | 489*             |
| Estimated GFR (ml/min/1.73m <sup>2</sup> ) | 82±2             | 80±2             | 70±3             |
| Background retinopathy (%)                 | 35%              | 83%*             | 89%*             |
| Peripheral neuropathy (%)                  | 38%              | 55%              | 80%*             |
| Total cholesterol (mmol/L)                 | 4.8±0.1          | 5.2±0.2*         | 5.3±0.2*         |
| VLDL cholesterol (mmol/L)                  | 0.2±0.0          | 0.2±0.0          | 0.3±0.0          |
| IDL cholesterol (mmol/L)                   | 0.2±0.0          | 0.2±0.0          | 0.3±0.0          |
| LDL cholesterol (mmol/L)                   | 2.8±0.1          | 3.2±0.1*         | 3.2±0.2*         |
| HDL cholesterol (mmol/L)                   | 1.6±0.0          | 1.6±0.0          | 1.6±0.0          |
| Triglycerides (mmol/L)                     | 1.0±0.1          | 1.1±0.1          | 1.1±0.1          |

\* vs individuals with normoalbuminuria, p<0.05
